# Supplementary material for: Insertion of benzyl isocyanide into a Zr–P bond and rearrangement. Atom-economical synthesis of a phosphaalkene
Source: Royal Society of Chemistry journal article supplement (doi:10.1039/b709506f), 2007-01-01
Supplement: b709506f.pdf [file b709506f.pdf]

## Supporting Information for:

### Insertion of Benzylisocyanide into a Zr–P bond and Rearrangement. Atom-Economical Synthesis of a Phosphaalkene

Samantha N. MacMillan<sup>†</sup>, Joseph M. Tanski<sup>†</sup>, and Rory Waterman<sup>\*‡</sup>

*Department of Chemistry, University of Vermont, Burlington, VT 05405-0125 and Department of Chemistry, Vassar College, Poughkeepsie, NY 12604*

---

## Experimental Section

**General Considerations.** All manipulations were performed under an atmosphere of dry nitrogen using Schlenk or high vacuum techniques and/or in a M. Braun glovebox. Dry, oxygen-free solvents were employed throughout. C<sub>6</sub>D<sub>6</sub> and toluene-*d*<sub>8</sub> were purchased from Cambridge Isotope Laboratory then degassed and dried over NaK alloy. <sup>1</sup>H, <sup>13</sup>C, and <sup>31</sup>P NMR spectra were recorded on Bruker AXR or Varian 500 MHz NMR spectrometers and are reported with reference to residual solvent resonances (C<sub>6</sub>H<sub>5</sub>, δ 7.16 and δ 128.0) or external H<sub>2</sub>PO<sub>4</sub>. PTFE = polytetrafluoroethylene.

(N<sub>3</sub>N)ZrPPh (**1**)<sup>1</sup> was prepared according to the literature protocol.<sup>2</sup> All other chemicals were used as received from commercial sources.

(N<sub>3</sub>N)Zr[C(PHPh)=NCH<sub>2</sub>Ph] (**2**). A round bottom flask was charged with (N<sub>3</sub>N)ZrPPh (86 mg, 0.154 mmol), and the solid was dissolved in 6 mL of benzene. The yellow solution was cooled to ca. 5 °C, and a 2 mL benzene solution of benzylisocyanide (18 mg, 0.154 mmol) was added to the zirconium solution resulting in an immediate color change to orange. The solution was stirred for 30 min then frozen, and the benzene removed by lyophilization to give a pale orange powder (98 mg, 0.144 mmol, 94%). Attempts to crystallize the complex gave a mixture of pure and rearranged products. The product converts slowly to (N<sub>3</sub>N)Zr[N(CH<sub>2</sub>Ph)C(H)=PPh] even in the solid state at –30 °C. <sup>1</sup>H (C<sub>6</sub>D<sub>6</sub>, 500.1 MHz): δ 7.750 (t, C<sub>6</sub>H<sub>6</sub>, 2 H), 7.554 (d, C<sub>6</sub>H<sub>6</sub>, 2 H), 7.202 (t, C<sub>6</sub>H<sub>6</sub>, 2 H), 7.102 (m, C<sub>6</sub>H<sub>6</sub>, 4 H), 6.038 (d, PH, J<sub>PH</sub> = 259 Hz), 4.903 (s, CH<sub>2</sub>, 2 H), 3.287 (br s, CH<sub>2</sub>, 6 H), 2.484 (s, CH<sub>2</sub>, 6 H), 0.090 (s, CH<sub>3</sub>, 27 H). <sup>13</sup>C (C<sub>6</sub>D<sub>6</sub>, 125.8 MHz): δ 263.21 (d, C=N, J<sub>PC</sub> = 99.5 Hz), 137.93 (s, Ph), 135.75 (d, Ph, J<sub>PC</sub> = 16.6 Hz), 129.34 (s, Ph), 129.01 (s, Ph), 128.68 (s, Ph), 128.66 (d, Ph, J<sub>PC</sub> = 6.9 Hz), 128.48 (s, Ph), 126.56 (s, Ph), 63.27 (d, CH<sub>2</sub>, J<sub>PC</sub> = 19.4 Hz), 61.21 (s, CH<sub>2</sub>), 47.45 (s, CH<sub>2</sub>), 2.19 (s, CH<sub>3</sub>). <sup>31</sup>P {<sup>1</sup>H} (C<sub>6</sub>D<sub>6</sub>, 202.4 MHz): –39.98 (s). IR (KBr, Nujol): 2280 s (ν<sub>PH</sub>), 1705 s (ν<sub>CN</sub>), 1592 s, 1582 s, 1529 s, 1479 m, 1452 s, 1376 s, 1349 w, 1243 s, 1184 w, 1146 m, 1061 s, 1025 m, 940 s, 910 s, 838 s, 786 s, 738 s, 696 s, 678 m, 624 w, 566 m, 498 s, 439 m cm<sup>–1</sup>.

(N<sub>3</sub>N)Zr[N(CH<sub>2</sub>Ph)C(H)=PPh] (**3**). A PTFE-valved reaction flask was charged with (N<sub>3</sub>N)ZrPPh (173 mg, 0.309 mmol) and 3 mL of benzene. Benzylisocyanide (36 mg, 0.309

---

<sup>†</sup> Vassar College

<sup>‡</sup> University of Vermont

mmol) was and the flask was sealed and heated to 90 °C for 3 h. The orange solution was then frozen, and the benzene removed by lyophilization to give an orange powder, which was extracted into ca. 3 mL Et<sub>2</sub>O. The orange solution was filtered and then cooled to -30 °C to yield pale yellow crystals in several crops (163 mg, 0.241 mmol, 78%). <sup>1</sup>H (C<sub>6</sub>D<sub>6</sub>, 500.1 MHz): 10.291 (br s, CH, 1 H), 7.836 (br, C<sub>6</sub>H<sub>6</sub>, 2 H), 7.543 (br, C<sub>6</sub>H<sub>6</sub>, 2 H), 7.260 (t, C<sub>6</sub>H<sub>6</sub>, 2 H), 7.092 (m, C<sub>6</sub>H<sub>6</sub>, 2 H), 7.045 (m, C<sub>6</sub>H<sub>6</sub>, 2 H), 5.207 (s, CH<sub>2</sub>, 2 H), 3.204 (s, CH<sub>2</sub>, 6 H), 2.278 (s, CH<sub>2</sub>, 6 H), 0.170 (s, CH<sub>3</sub>, 27 H). <sup>13</sup>C (C<sub>6</sub>D<sub>6</sub>, 125.8 MHz): δ 193.12 (d, C=N, J<sub>PC</sub> = 55.6 Hz), 138.76 (s, Ph), 133.35 (s, Ph), 132.88 (d, Ph, J<sub>PC</sub> = 16.6 Hz), 128.46 (s, Ph), 128.28 (s, Ph), 126.71 (s, Ph), 126.37 (s, Ph), 65.73 (s, CH<sub>2</sub>), 64.46 (s, CH<sub>2</sub>), 46.78 (s, CH<sub>2</sub>), 1.38 (s, CH<sub>3</sub>), one phenyl carbon resonance was not observed, presumably obscured by solvent. <sup>31</sup>P{<sup>1</sup>H} (C<sub>6</sub>D<sub>6</sub>, 202.4 MHz): 91.85 (br s, Δv<sub>1/2</sub> = 45 Hz). IR (KBr, Nujol): 1603 m, 1581 s, 1494 s, 1464 s, 1444 s, 1377 s, 1341 w, 1330 w, 1267 s, 1245 s, 1184 m, 1143 w, 1122 w, 1058 s, 1023 s, 979 m, 925 s, 897 m, 834 s, 783 s, 736 s, 694 m, 678 m, 623 w, 585 w, 565 s, 486 m, 459 s, 432 w cm<sup>-1</sup>. Anal. Calcd for C<sub>29</sub>H<sub>52</sub>N<sub>5</sub>Si<sub>3</sub>PHf: C, 51.43; H, 7.74; N, 10.34. Found: C, 51.54; H, 7.44; N, 10.63.

<sup>1</sup>H (C<sub>6</sub>D<sub>6</sub>, 500.1 MHz) at 340 K: 10.167 (d, CH, J<sub>PH</sub> = 11.6 Hz, 1 H), 7.774 (t, C<sub>6</sub>H<sub>6</sub>, 2 H), 7.523 (d, C<sub>6</sub>H<sub>6</sub>, 2 H), 7.221 (t, C<sub>6</sub>H<sub>6</sub>, 2 H), 7.104 (m, C<sub>6</sub>H<sub>6</sub>, 2 H), 7.032 (m, C<sub>6</sub>H<sub>6</sub>, 2 H), 5.156 (s, CH<sub>2</sub>, 2 H), 3.247 (s, CH<sub>2</sub>, 6 H), 2.371 (s, CH<sub>2</sub>, 6 H), 0.153 (s, CH<sub>3</sub>, 27 H).

<sup>1</sup>H (toluene-*d*<sub>8</sub>, 500.1 MHz) at 215 K: 10.251 (d, CH, J<sub>PH</sub> = 12.68 Hz, 1 H), 7.739 (t, C<sub>6</sub>H<sub>6</sub>, 2 H), 7.365 (d, C<sub>6</sub>H<sub>6</sub>, 2 H), 7.134 (t, C<sub>6</sub>H<sub>6</sub>, 2 H), 6.976 (m, C<sub>6</sub>H<sub>6</sub>, 2 H), 6.818 (m, C<sub>6</sub>H<sub>6</sub>, 2 H), 5.109 (s, CH<sub>2</sub>, 2 H), 3.799 (s, CH<sub>2</sub>, 6 H), 1.909 (s, CH<sub>2</sub>, 6 H), 0.339 (s, CH<sub>3</sub>, 27 H).

**Activation barrier measurement.** Coalescence of the phosphalkene proton coupling to phosphorus of complex **3** in toluene-*d*<sub>8</sub> was monitored by variable temperature NMR spectroscopy (<sup>1</sup>H and <sup>31</sup>P) over a range of 215–320 K. Analysis of the coalescence parameters (T, Δv) gave an activation barrier ΔG<sup>‡</sup> = 15.1(4) kcal/mol for a coalescence temperature of 292 K with slow exchange coupling of 12.5 Hz.<sup>3</sup>

### X-ray Structure Determination:

X-ray diffraction data were collected on a Bruker APEX 2 CCD platform diffractometer (Mo Kα (λ = 0.71073 Å)) at 125 K. A suitable orange crystal of (N<sub>3</sub>N)Zr[N(CH<sub>2</sub>Ph)C(H)=PPh], grown by cooling a concentrated Et<sub>2</sub>O solution to -30 °C, was mounted in a nylon loop with Paratone-*N* cryoprotectant oil. The structure was solved using direct methods and standard difference map techniques and was refined by full-matrix least-squares procedures on *F*<sup>2</sup> with SHELXTL (Version 6.14).<sup>4</sup> All non-hydrogen atoms were refined anisotropically. Hydrogen atoms on carbon were included in calculated positions and were refined using a riding model except the hydrogen atom on the phosphalkene carbon, H(16), which was located in the Fourier difference map and refined. Crystal data and refinement details are presented in Table 1.

**Table 1.** Crystal data and structure refinement for (N<sub>3</sub>N)Zr[N(CH<sub>2</sub>Ph)C(H)=PPh] (**3**).

|                                   |                                                                                                  |
|-----------------------------------|--------------------------------------------------------------------------------------------------|
| Identification code               | rw431zr                                                                                          |
| Empirical formula                 | C <sub>29</sub> H <sub>52</sub> N <sub>5</sub> PSi <sub>3</sub> Zr                               |
| Formula weight                    | 677.22                                                                                           |
| Temperature                       | 125(2) K                                                                                         |
| Wavelength                        | 0.71073 Å                                                                                        |
| Crystal system, space group       | Monoclinic, P2 <sub>1</sub> /c                                                                   |
| Unit cell dimensions              | a = 16.5616(8) Å    α = 90°<br>b = 10.9871(5) Å    β = 110.889(1)°<br>c = 21.170(1) Å    γ = 90° |
| Volume                            | 3598.9(3) Å <sup>3</sup>                                                                         |
| Z, Calculated density             | 4, 1.250 Mg/m <sup>3</sup>                                                                       |
| Absorption coefficient            | 0.475 mm <sup>-1</sup>                                                                           |
| F(000)                            | 1432                                                                                             |
| Crystal size                      | 0.22 x 0.25 x 0.19 mm                                                                            |
| Theta range for data collection   | 1.35 to 30.45°                                                                                   |
| Limiting indices                  | -23 ≤ h ≤ 23, -15 ≤ k ≤ 15,<br>-29 ≤ l ≤ 29                                                      |
| Reflections collected / unique    | 49757 / 10366 [R <sub>int</sub> = 0.0351]                                                        |
| Completeness to theta = 30.45°    | 94.7 %                                                                                           |
| Absorption correction             | Empirical                                                                                        |
| Max. and min. transmission        | 0.9152 and 0.8905                                                                                |
| Refinement method                 | Full-matrix least-squares on F <sup>2</sup>                                                      |
| Data / restraints / parameters    | 10366 / 0 / 365                                                                                  |
| Goodness-of-fit on F <sup>2</sup> | 1.033                                                                                            |
| Final R indices [I > 2σ(I)]       | R <sub>1</sub> = 0.0289, wR <sub>2</sub> = 0.0678                                                |
| R indices (all data)              | R <sub>1</sub> = 0.0394, wR <sub>2</sub> = 0.0724                                                |
| Largest diff. peak and hole       | 0.476 and -0.352 eÅ <sup>-3</sup>                                                                |

## References

- (1) R. Waterman, *Organometallics*, **2007**, *26*, 2492–2494.
- (2) A new, more efficient synthesis of **1** has been developed by reaction of the reported metalated complex,  $[\eta^5\text{-(Me}_3\text{SiNCH}_2\text{CH}_2)_2\text{NCH}_2\text{CH}_2\text{NSiMe}_2\text{CH}_2\text{]Zr}^1$  and phenylphosphine: A. J. Roering and R. Waterman, unpublished results.
- (3) H. S. Gutowsky and C. H. Holm, *J. Chem. Phys.*, **1956**, *25*, 1228–1234. (b) M. Raban, D. Kost, and E. H. Carlson, *J. Chem. Soc. Chem. Commun.*, **1971**, 656–657.
- (4) G. M. Sheldrick, *SHELXTL*, An Integrated System for Solving, Refining and Displaying Crystal Structures from Diffraction Data; University of Göttingen: Göttingen, Germany, 1981.
